# Supplementary material for: Peptide–carbon hybrid membranes for highly efficient and selective extraction of actinides from rare earth elements
Source: Royal Society of Chemistry journal article supplement (doi:10.1039/d1ta03549e), 2021-01-01
Supplement: d1ta03549e4.pdf [file d1ta03549e4.pdf]

## SUPPORTING INFORMATION

---

### Supporting Information

#### **Peptide-Carbon Hybrid Membranes for Highly Efficient and Selective Extraction of Actinides from Rare Earth Elements**

Yangyang Gao,<sup>a</sup> Qian Zhang,<sup>a</sup> Ying Lv,<sup>b</sup> Sheng Wang,<sup>a</sup> Meng Men,<sup>c</sup> Hisayoshi Kobayashi,<sup>d</sup> Zhanglian Xu,<sup>\*a</sup> Yin Wang<sup>\*e</sup>

- <sup>a</sup> Shaanxi Key Laboratory of Advanced Nuclear Energy and Technology and Shaanxi Engineering Research Center of Advanced Nuclear Energy, School of Nuclear Science and Technology, Xi'an Jiaotong University, Xi'an, Shaanxi, 710049, P. R. China.  
E-mail: xuzhanglian@xjtu.edu.cn
- <sup>b</sup> College of Materials Science and Engineering, Xi'an Shiyou University, No.18, 2nd East Dianzi Road, Xi'an, Shaanxi, 710065, P. R. China
- <sup>c</sup> Shaanxi Province Radioactive Environmental Supervision and Management Station, Xi'an, Shaanxi, 710065, P. R. China
- <sup>d</sup> Emeritus professor of Kyoto Institute of Technology, Matsugasaki, Sakyo-ku, Kyoto, 606-8585, Japan
- <sup>e</sup> School of Pharmacy, Shanghai Jiao Tong University, Shanghai 200240, P. R. China; Department of Chemistry and Macromolecules Innovation Institute, Virginia Tech, Blacksburg, VA 24061, United States  
E-mail: yinwang@sjtu.edu.cn or ywang300@vt.edu

## SUPPORTING INFORMATION

### Data

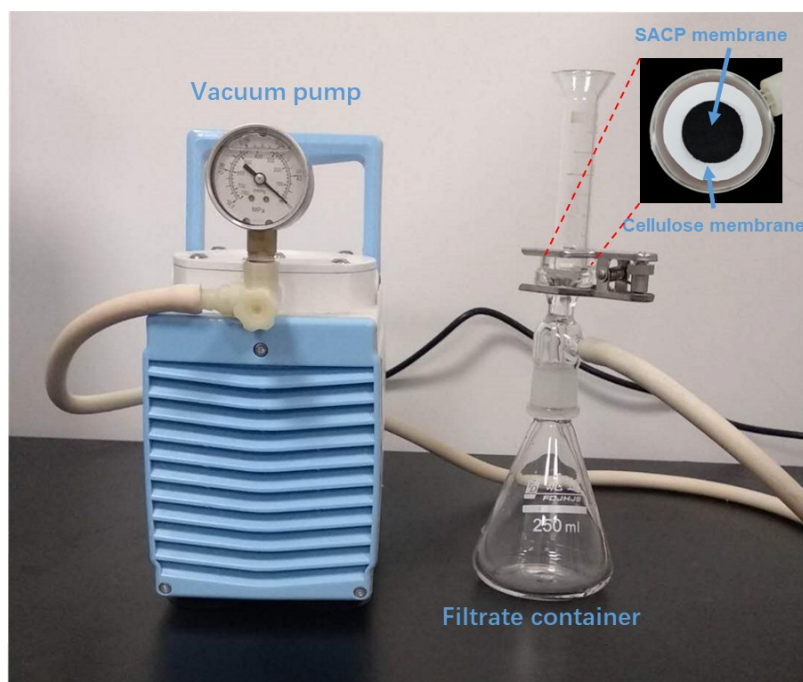

**Fig. S1.** The photograph of vacuum filtration using in membrane fabrication and pressure-driven adsorption.

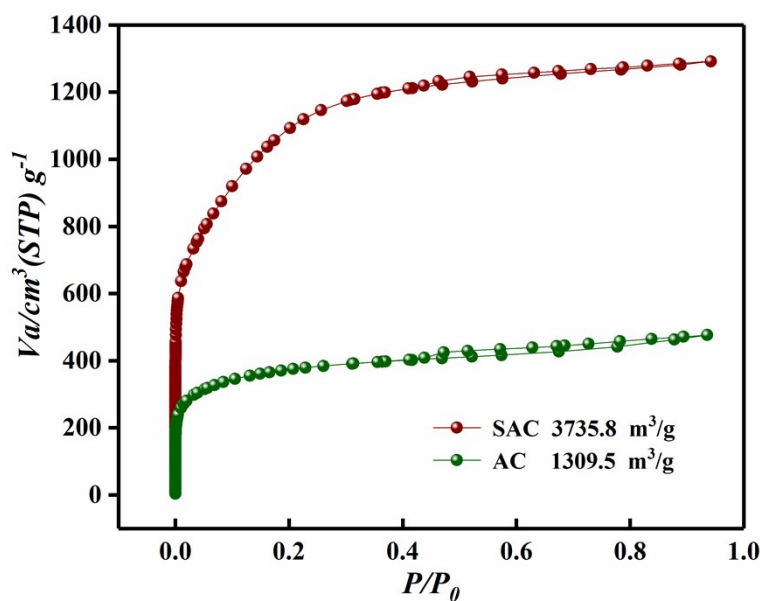

**Fig. S2.** The nitrogen sorption isotherms of SAC and AC composites.

First, the purity of the peptide was determined by high performance liquid chromatography (HPLC, DGU-20A5R with a LC-20AT infusion pump). As shown in Fig. S3a, a distinct peak

## SUPPORTING INFORMATION

appeared at 17.36 min with 95.69% of the total peak area, indicating the high purity of the peptide produced. Further calculations based on mass spectrometry (MS, Shimadzu LCMC-2020) showed that the relative molecular mass of the peptide was 1359.60 (Fig. S3b), which was very close to its theoretical value of 1359.62, indicating that the designed peptide was successfully prepared.

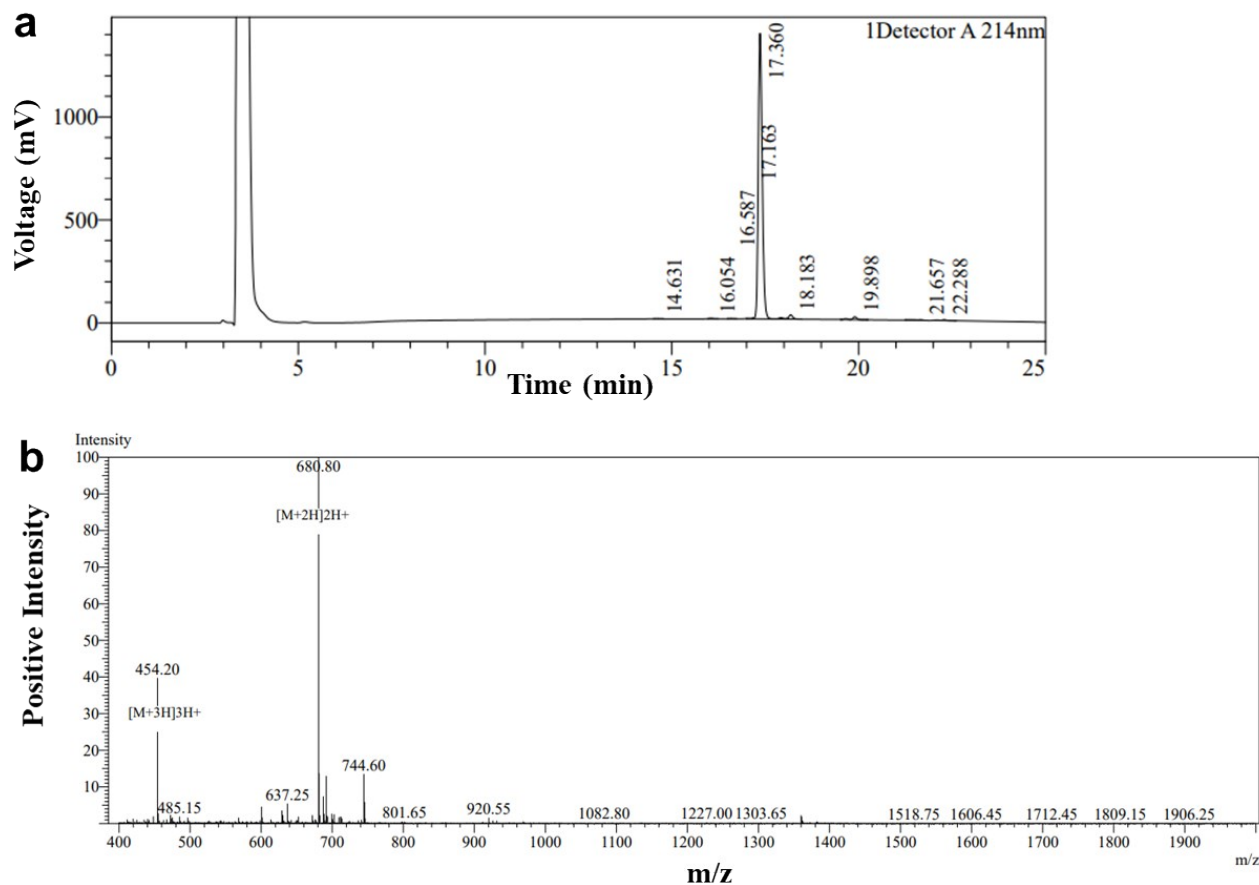

Fig. S3. HPLC and MS characterizations of peptides used in this study.

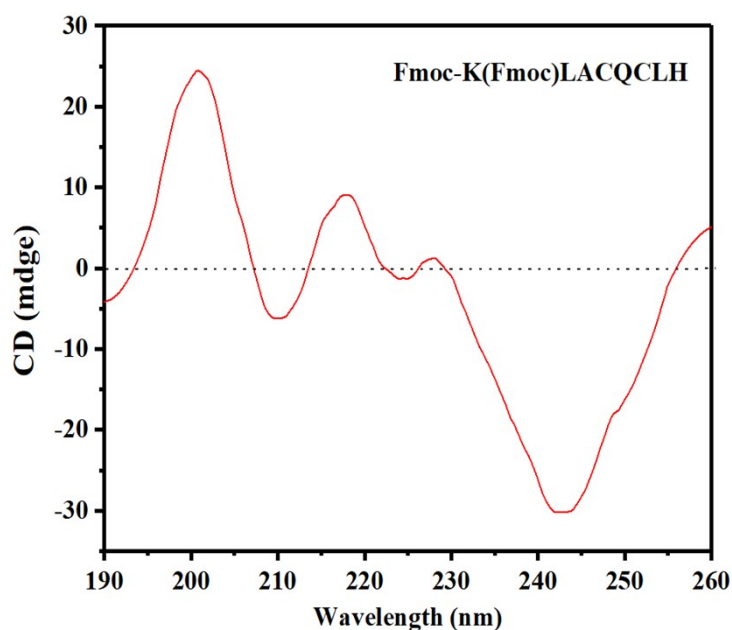

## SUPPORTING INFORMATION

---

**Fig. S4.** CD spectrum of rationally designed peptide used in the present study in water/acetonitrile (3:1 v/v) solution.

## SUPPORTING INFORMATION

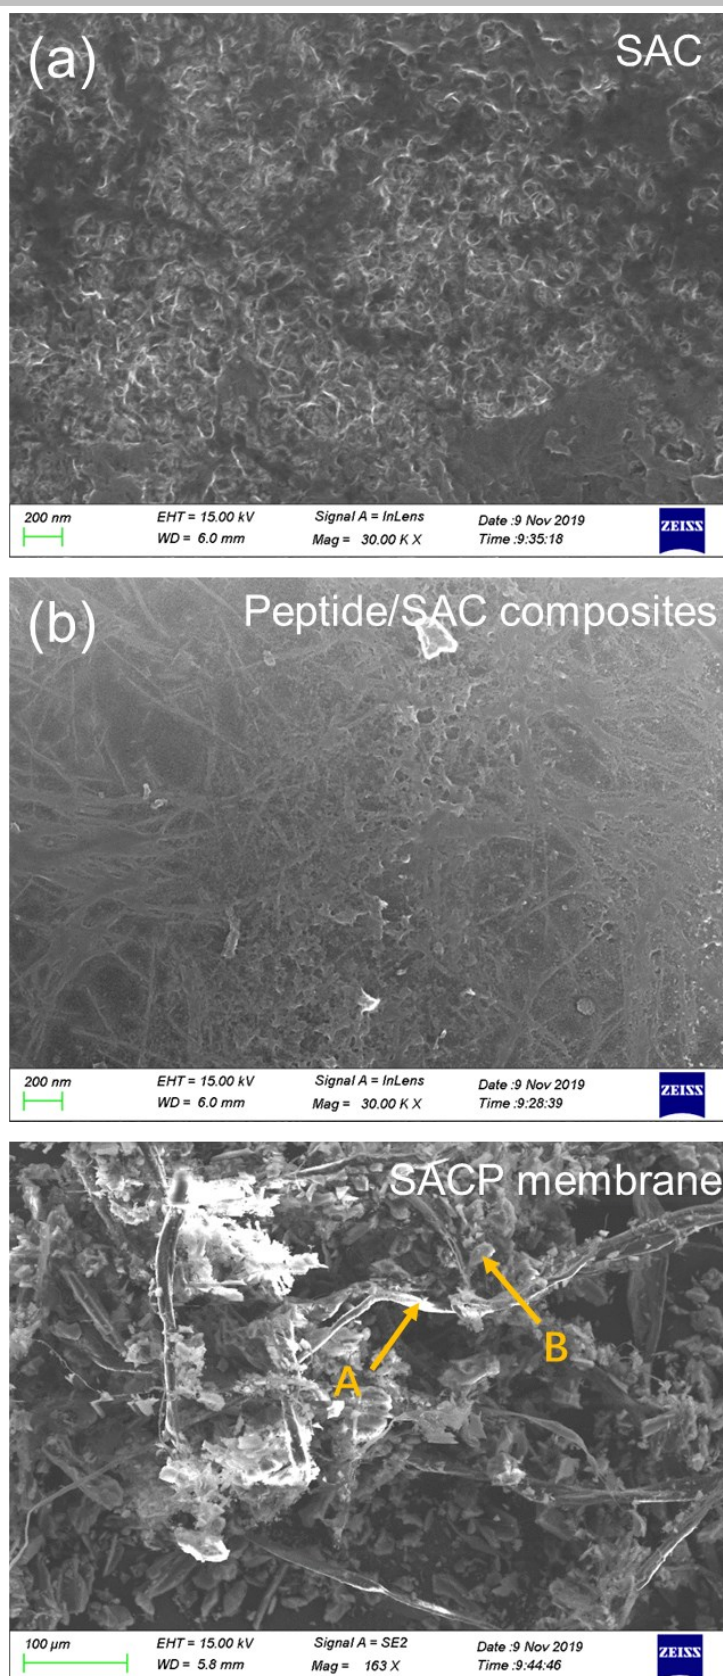

**Fig. S5** Representative SEM images of (a) SAC, (b) peptide/SAC composites, and (c) SACP-5 membrane, arrows A and B represent paper pulp fiber and peptide/SAC composites, respectively.

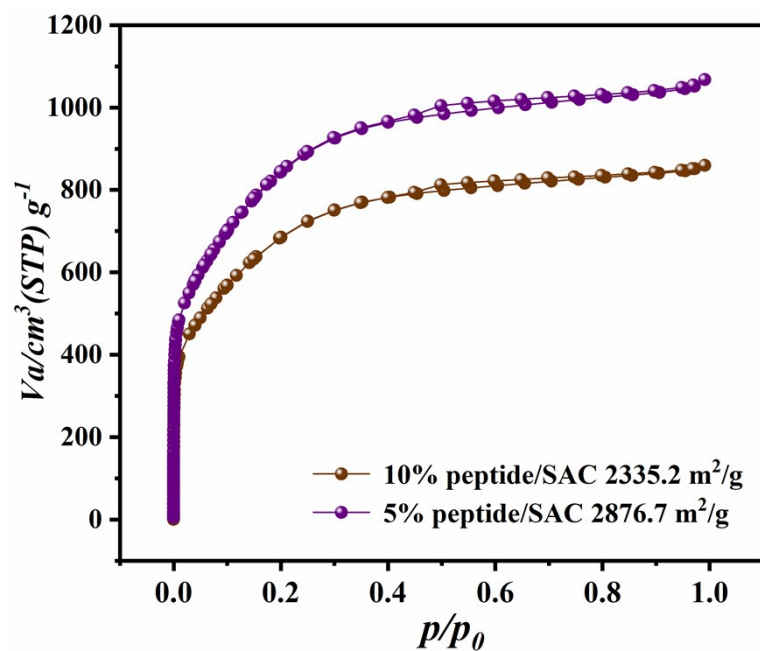

**Fig. S6** The nitrogen sorption isotherms of 5% and 10% peptide/SAC composites.

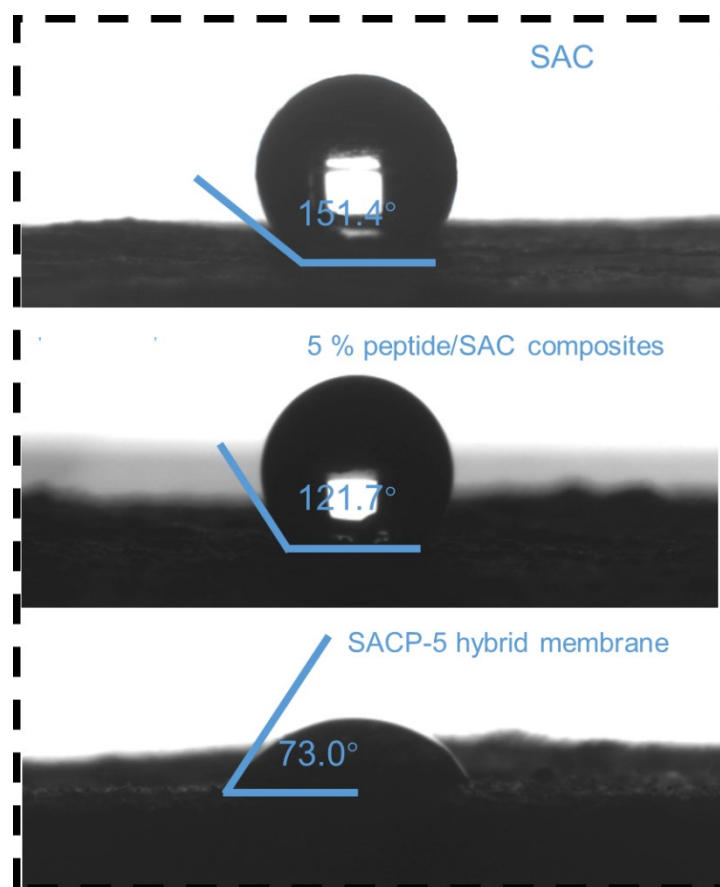

**Fig. S7** Water contact angle images of SAC, 5% peptide/SAC composites, and the SACP-5 hybrid membranes.

## SUPPORTING INFORMATION

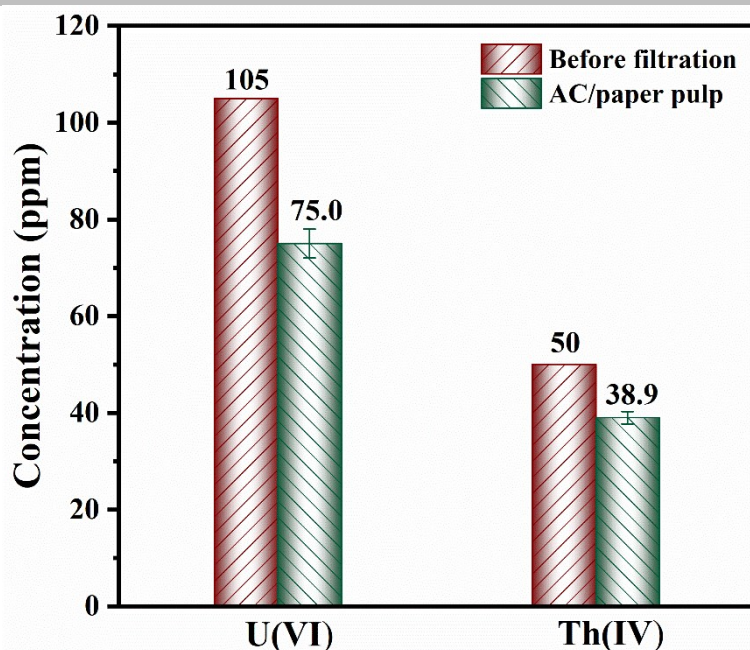

**Fig. S8** Removal performance of AC membranes for U(VI) and Th(IV), pH values of U(VI) and Th(IV) solutions were 6.0 and 4.0, respectively.

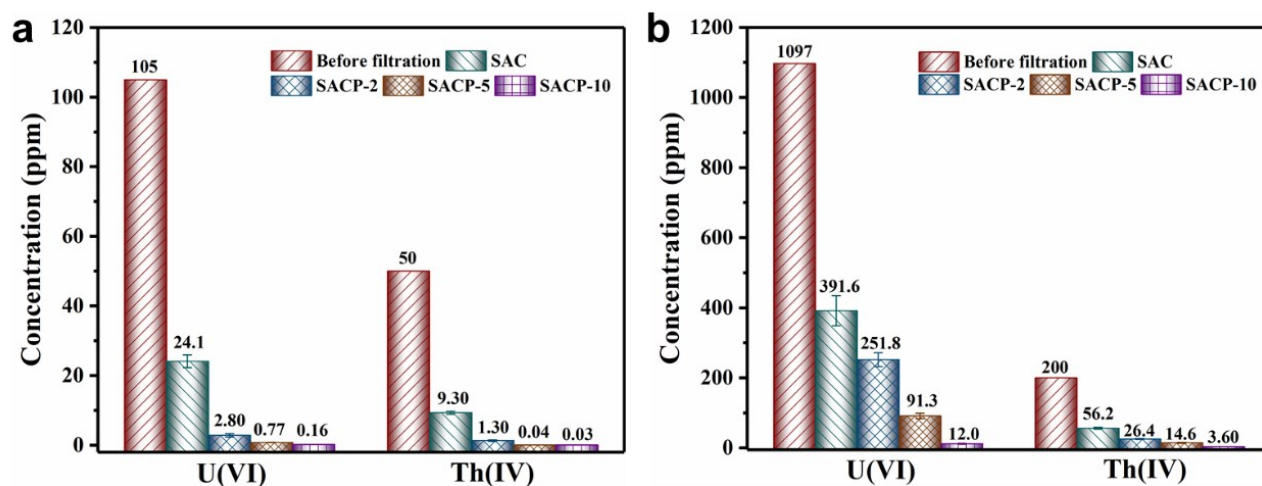

**Fig. S9** The filtration performance of the SACP hybrid membranes with different peptide contents. All error bars represent standard deviation from bipartite experiments. The pHs of U(VI) and Th(IV) solutions were 6.0 and 4.0, respectively.

## SUPPORTING INFORMATION

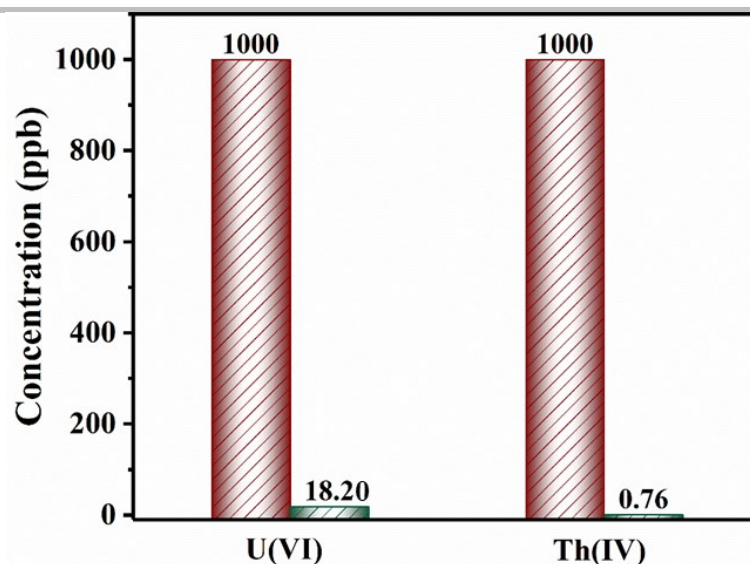

**Fig. S10** Filtration performances of the SACP-5 hybrid membranes in removal of U(VI) and Th(IV) at the ultralow concentration of 1000 ppb. The pH values for U(VI) and Th(IV) were 6.0 and 5.0, respectively.

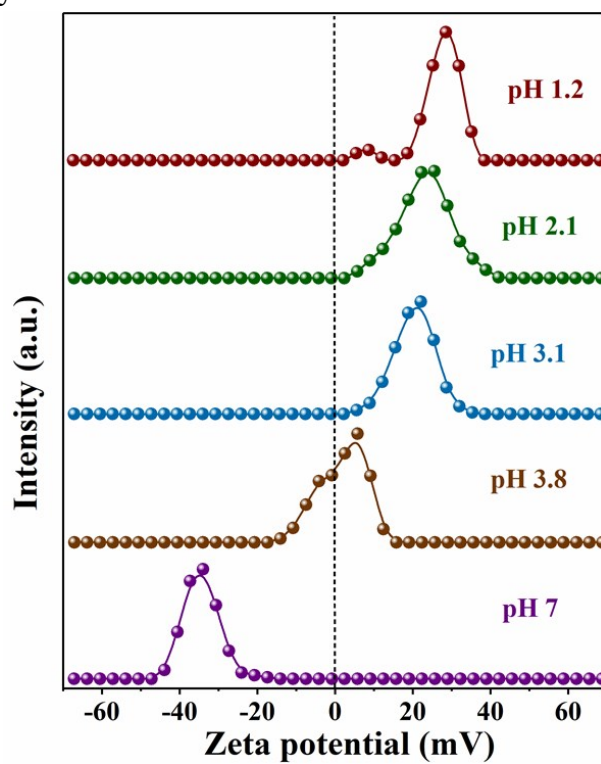

**Fig. S11** Zeta potential of SACP-5 at different pHs.



## SUPPORTING INFORMATION

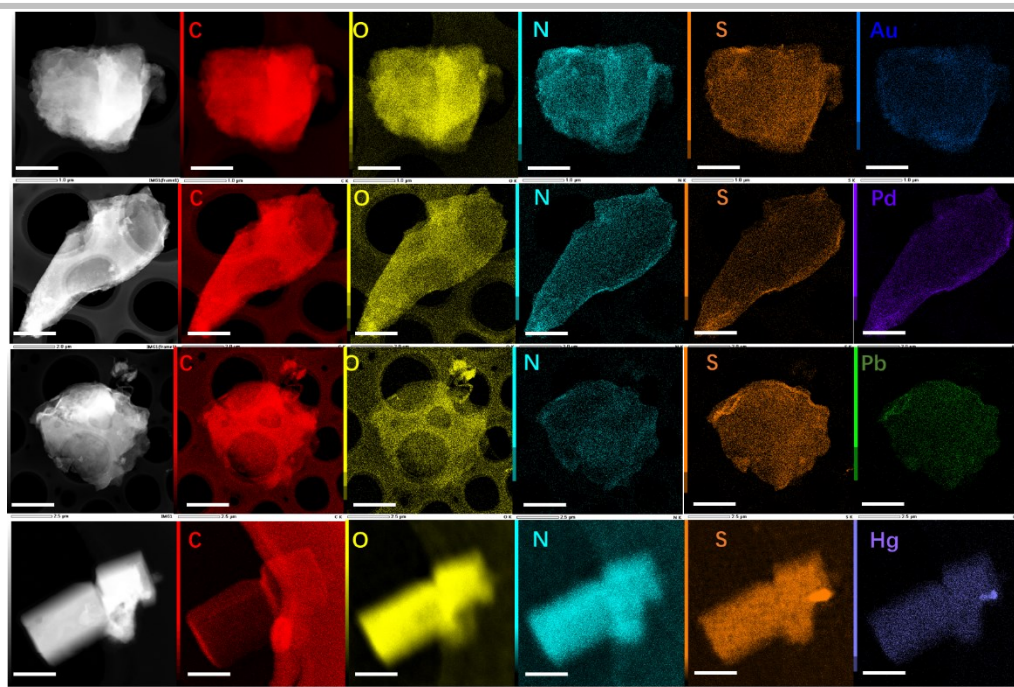

**Fig. S12.** STEM and elemental mapping images of 5% peptide/SAC composites after adsorbing four HMIs. The scale bars are 1  $\mu\text{m}$ , 2.0  $\mu\text{m}$ , 2.5  $\mu\text{m}$ , and 200 nm for  $\text{Au}(\text{CN})_2^-$ ,  $\text{PdCl}_4^{2-}$ ,  $\text{Pb}^{2+}$ , and  $\text{Hg}^{2+}$ , respectively.

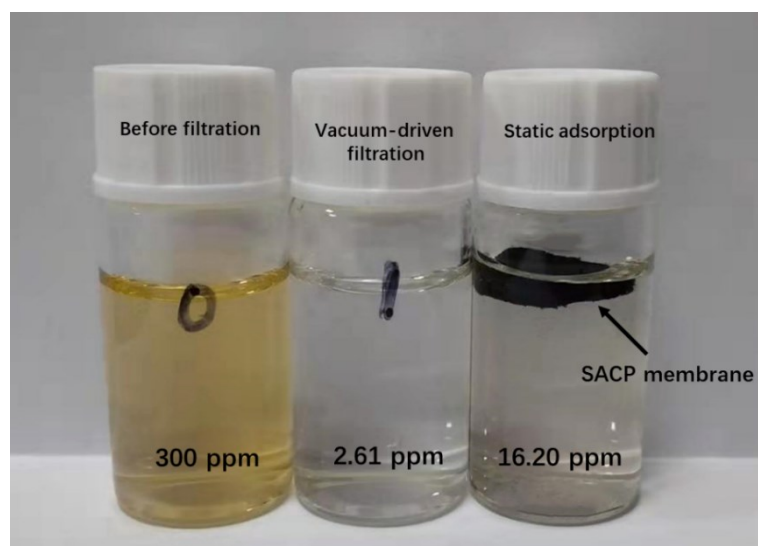

**Fig. S13.** Adsorption comparison of  $\text{PdCl}_4^{2-}$  between vacuum-driven filtration (within 1 min) and static adsorption (24 h).

## SUPPORTING INFORMATION

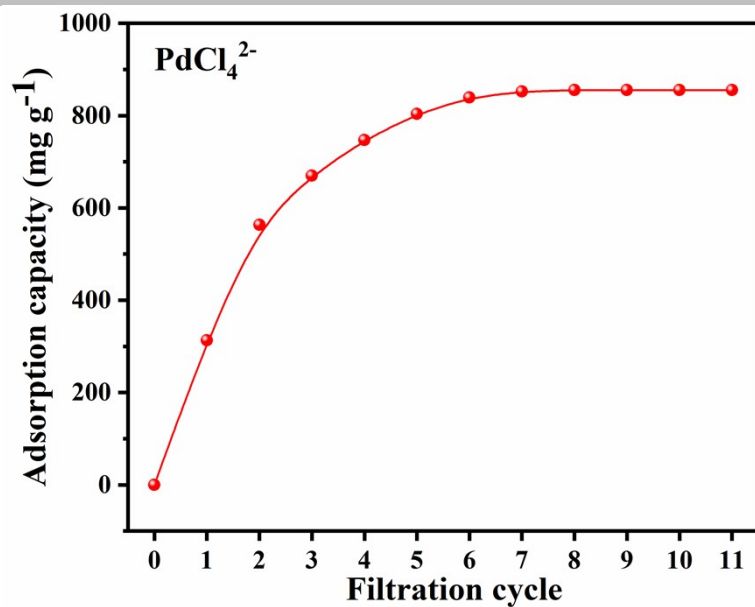

**Fig. S14.** Saturation adsorption capacity of SACP-5 hybrid membranes for PdCl<sub>4</sub><sup>2-</sup> ( $C_0=1000$  ppm, pH 1.0).

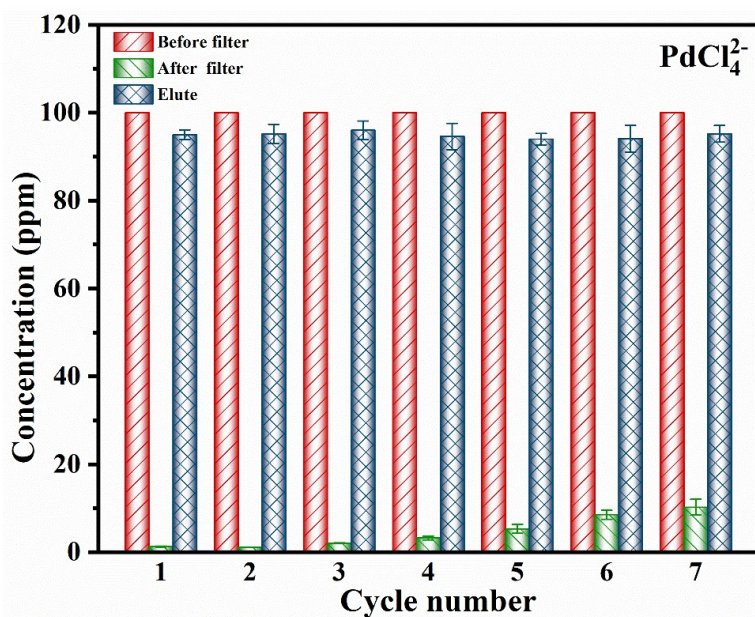

**Fig. S15.** Reusability of SACP-5 hybrid membranes for PdCl<sub>4</sub><sup>2-</sup> with 2 wt % EDTA solution as the eluent after each filtration.

## SUPPORTING INFORMATION

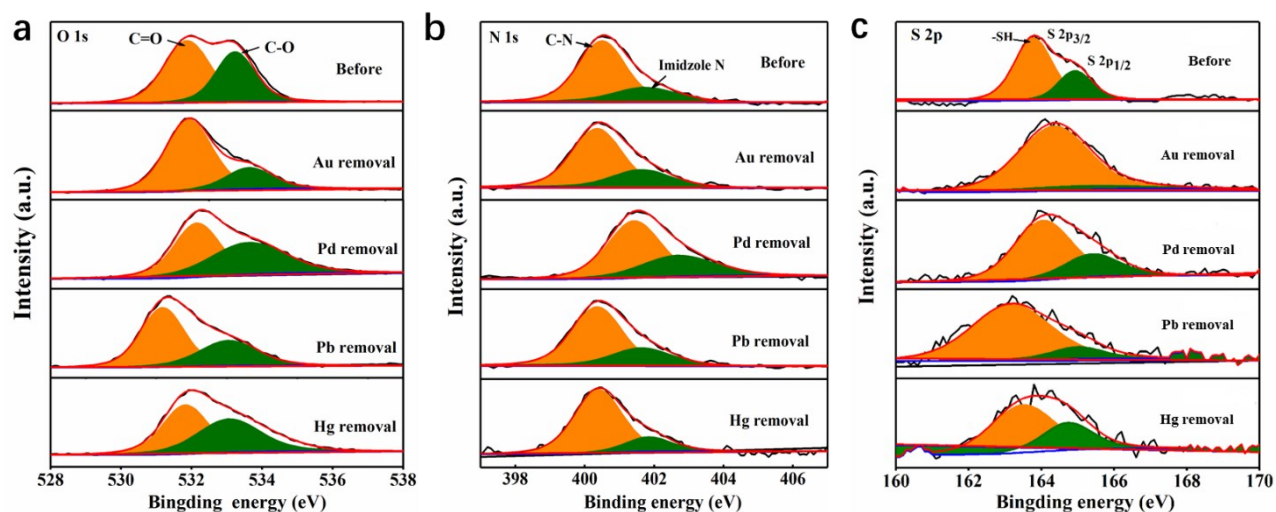

**Fig. S16.** High-resolution XPS spectra of a) O 1s, b) N 1s, and c) S 2p region of 5% peptide/SAC composites before and after the removal of  $\text{Au}(\text{CN})_2^-$ ,  $\text{PdCl}_4^{2-}$ ,  $\text{Pb}^{2+}$ , and  $\text{Hg}^{2+}$ .

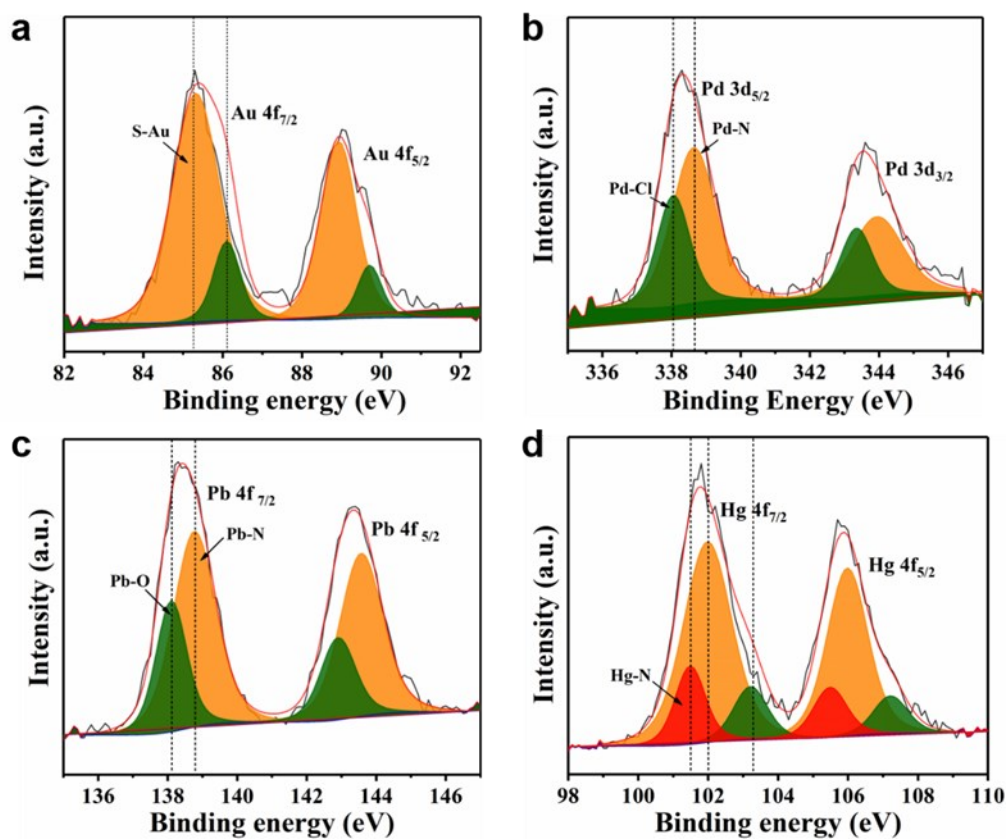

**Fig. S17.** High-resolution XPS spectra of a) Au 4f, b) Pd 3d, c) Pb 4f, and d) Hg 4f.

## SUPPORTING INFORMATION

**Table S1.** The constitution of peptide-carbon membranes used in this work.

| Membrane | Carbon (mg) | Peptide(mg) | Paper pulp |
|----------|-------------|-------------|------------|
| SAC      | 30.0 (SAC)  | 0           | 15         |
| Peptide  | 0           | 1.5         | 15         |
| SACP-2   | 29.4 (SAC)  | 0.6         | 15         |
| SACP-5   | 28.5 (SAC)  | 1.5         | 15         |
| SACP-10  | 27.0 (SAC)  | 3.0         | 15         |
| AC       | 30.0 (AC)   | 0           | 15         |

**Table S2.** The surface area and porosity of different porous carbon materials.

| Carbon materials           | $S_{\text{BET}}(\text{m}^2 \text{g}^{-1})$ | $V_p(\text{cm}^3 \text{g}^{-1})$ | Ref        |
|----------------------------|--------------------------------------------|----------------------------------|------------|
| SACP-5                     | 2876.5                                     | 1.65                             | This study |
| SACP-10                    | 2335.2                                     | 1.33                             |            |
| SAC                        | 3735.8                                     | 2.0                              |            |
| uGil-900                   | 4200                                       | 2.41                             | 1          |
| MPPy- derived carbon       | 4000                                       | 3.0                              | 2          |
| CNT composites             | 1479–3802                                  | 0.83-2.98                        | 3          |
| CA-4800                    | 3771                                       | 1.75                             | 4          |
| Ac8-CA                     | 3343                                       | 2.65                             | 5          |
| ZTC-X                      | 3332                                       | 1.66                             | 5          |
| CT-2-800                   | 3010                                       | 1.57                             | 4          |
| CA-4900                    | 2864                                       | 1.32                             | 4          |
| PFA+propylenes             | 2170-3600                                  | 0.9-1.5                          | 6          |
| Propylene                  | 2260                                       | 1.11                             | 6          |
| CA-4700                    | 2001                                       | 0.95                             | 4          |
| WMC-O                      | 1056                                       | NA                               | 7          |
| Ordered mesoporous carbons | 115-185                                    | 1.12-1.63                        | 8          |

## SUPPORTING INFORMATION

**Table S3.**  $K_d$  values of REEs in the adsorption of SACP-5 for RREs mixed solution without U(VI) and Th(IV).

| Elements | $K_d$ (mL g <sup>-1</sup> ) |
|----------|-----------------------------|
| Y        | 15.71                       |
| La       | 109.34                      |
| Ce       | 5.76                        |
| Pr       | 79.21                       |
| Nd       | 91.30                       |
| Eu       | 94.02                       |
| Gd       | 214.91                      |
| Yb       | 138.14                      |

**Table S4.** Comparison of adsorbents for adsorption time and  $K_d$  values.

| Absorbents              | adsorption time (min) | $K_d^U$ (mL g <sup>-1</sup> ) | $K_d^{Th}$ (mL g <sup>-1</sup> ) | Ref.              |
|-------------------------|-----------------------|-------------------------------|----------------------------------|-------------------|
| SACP-5 membrane         | 1 (min/filtration)    | $5.01 \times 10^7$            | $1.67 \times 10^8$               | <b>This study</b> |
| Hfp-0.80                | 120                   | $1.26 \times 10^5$            | $5.84 \times 10^4$               | 9                 |
| SiO <sub>2</sub> -MeO-2 | 360                   | $1.9 \times 10^4$             | $9 \times 10^5$                  | 10                |
| DVB-VPA                 | 180                   | NA                            | NA                               | 11                |
| WMC-O                   | 240                   | NA                            | $1.3 \times 10^5$                | 7                 |
| FJSM-GAS-1              | 1740                  | $6.06 \times 10^6$            | NA                               | 12                |
| FJSM-GAS-2              | NA                    | $5.12 \times 10^4$            | NA                               | 12                |
| ACFs-AO                 | 2880                  | $1.99 \times 10^4$            | NA                               | 13                |
| mGO-PAO                 | 100                   | $4.44 \times 10^5$            | NA                               | 14                |
| HCPP                    | 180                   | $2.68 \times 10^5$            | NA                               | 15                |
| P-Fe-CMK-3              | 30                    | $1 \times 10^5$               | NA                               | 16                |
| SBA-15-O-DMPA           | 120                   | NA                            | $2.0 \times 10^4$                | 17                |

## SUPPORTING INFORMATION

---

**Movie S1** The SACP-5 hybrid membrane was rigorously stirred without any damage, demonstrating the good mechanical property of this hybrid membrane. **Movie S2** and **Movie S3** show the filtration tests using the SACP-5 hybrid membrane and 5% peptide/SAC composites, respectively. The paper pulp can fix the peptide/SAC composites well thus result in clear filter solution (See Movie S2), while the original peptide/SAC composites without paper pulp suspended into the filtering solution and cannot form the self-standing membranes through vacuum filtration (See Movie S3). Meanwhile, the addition of paper pulp also resulted in the faster filtration kinetics. The pure water flux was improved from  $2.14 \times 10^4 \text{ L m}^{-2} \text{ h}^{-1} \text{ bar}^{-1}$  of peptide/SAC composites to  $5.14 \times 10^4 \text{ L m}^{-2} \text{ h}^{-1} \text{ bar}^{-1}$  of SACP-5 hybrids membrane. (Movie S2 vs Movie S3).

## SUPPORTING INFORMATION

---

### References

- 1 A. S. Jalilov, Y. Li, J. Tian, J. M. Tour, *Adv. Energy. Mater.* 2017, **7**, 1600693-1600699.
- 2 B. Adeniran, R. Mokaya, *Nano Energy.* 2015, **16**, 173-185.
- 3 B. Adeniran, R. Mokaya, *J. Mater. Chem. A.* 2015, **3**, 5148-5161.
- 4 T. S. Blankenship, N. Balahmar, R. Mokaya, *Nat. commun.* 2017, **8**, 1545-1556.
- 5 E. Masika, R. Mokaya, *J. Phy. Chem. C.* 2012, **116**, 25734-25740.
- 6 M. Sevilla, A. B. Fuertes, *Micropor Mesopor Mater.* 2012, **158**, 318-323.
- 7 M. Inagaki, M. Toyoda, T. Tsumura, *RSC Adv.* 2014, **4**, 41411-41424.
- 8 Z. Wang, A. Brown, K. Tan, Y. Chabal, K. Balkus, *J. Am. Chem. Soc.* 2018, **140**, 14735-14739.
- 9 S. B. Yoon, G. S. Chai, S. K. Kang, J. S. Yu, K. P. Gierszal, M. Jaroniec, *J. Am. Chem. Soc.* 2005, **127**, 4188-4189.
- 10 L. Léveillé, C. Aumaitre, J. Morin, N. Reynier, D. Larivière. *Sep. Purif. Technol.* 2019, **228**, 115709-115718.
- 11 D. Yuan, S. Zhang. *Sep. Purif. Technol.* **2020**, 237. 116379-116389.
- 12 X. Lu, D. Zhang, A. T. Reda, C. Liu, Z. Yang, S. Guo, S. Xiao, Y. Ouyang. *Ind. Eng. Chem. Res.* 2017, **56**, 11936-11947.
- 13 M. Feng, Y. Gao, D. Sarma, *J. Am. Chem. Soc.* 2018, **140**, 11133-11140.
- 14 Z. Dai, Y. Sun, H. Zhang, D. Ding, L. Li. *J. Chem. Eng. Data.* 2018, **64**, 4125-4225.
- 15 T. Di, D. Tan, Q. Yu. *Langmuir.* 2019, **35**, 13860-13871.
- 16 S. M. Husnain, H. Kim, *Ind. Eng. Chem. Res.* 2017, **56**, 9821-9830.
- 17 F. Zhang, K. Ma, Y. Li, Q. Ran, C. Yao, C. Yang, H. Yu, S. Hu, S. Peng. *Chem. Eng. J.* 2020, **392**, 123717-123727.
